# Supplementary material
Source: MDPI journal article supplement (https://www.mdpi.com/2297-8739/9/6/141)
Supplement: s1 [file s1]

Supplementary Material

## Measuring Vitamin D<sub>3</sub> Metabolic Status, Comparison between Vitamin D Deficient and Sufficient Individuals

Laura de los Santos Castillo-Peinado <sup>1,2,3,4</sup>, Mónica Calderón-Santiago <sup>1,2,3,4</sup>, Aura Dulcinea Herrera-Martínez <sup>2,5</sup>, Soraya León-Idougourram <sup>2,5</sup>, María Ángeles Gálvez-Moreno <sup>2,5</sup>, Rafael Luis Sánchez-Cano <sup>2,6</sup> Roger Bouillon <sup>7</sup>, Jose Manuel Quesada-Gómez <sup>2,4</sup> and Feliciano Priego-Capote <sup>1,2,3,4,\*</sup>

**Table S1.** MRM parameters for detection of target metabolites and ISs.

| Analyte                                               | Data acquisition segments | Precursor ion ( <i>m/z</i> ) | Fragmentor (V) | Adduct                               | Collision energy (eV) | Dwell time (ms) | Quantitation transition | RT (min) |
|-------------------------------------------------------|---------------------------|------------------------------|----------------|--------------------------------------|-----------------------|-----------------|-------------------------|----------|
| 1,24,25(OH) <sub>3</sub> D <sub>3</sub>               | 1 – 3.5 min               | 397.3                        | 80             | [M+H-2H <sub>2</sub> O] <sup>+</sup> | 30                    | 500             | 397.3 → 107.1           | 2.8      |
| 24,25(OH) <sub>2</sub> D <sub>3</sub>                 | 3.5 – 7 min               | 399.3                        | 170            | [M+H-H <sub>2</sub> O] <sup>+</sup>  | 30                    | 130             | 399.3 → 121.0           | 4.1      |
| 24,25(OH) <sub>2</sub> D <sub>3</sub> -d <sub>6</sub> |                           | 405.5                        | 170            | [M+H-H <sub>2</sub> O] <sup>+</sup>  | 20                    |                 | 405.3 → 121.0           |          |
| 1,25(OH) <sub>2</sub> D <sub>3</sub>                  |                           | 399.3                        | 140            | [M+H-H <sub>2</sub> O] <sup>+</sup>  | 30                    |                 | 399.3 → 227.1           | 5.2      |
| 1,25(OH) <sub>2</sub> D <sub>3</sub> -d <sub>3</sub>  |                           | 402.5                        | 140            | [M+H-H <sub>2</sub> O] <sup>+</sup>  | 20                    |                 | 402.3 → 230.1           |          |

|                                            |             |       |     |                                     |    |     |               |      |
|--------------------------------------------|-------------|-------|-----|-------------------------------------|----|-----|---------------|------|
| <b>25(OH)D<sub>3</sub></b>                 | 7 – 10 min  | 383.3 | 145 | [M+H-H <sub>2</sub> O] <sup>+</sup> | 30 | 250 | 383.3 → 107.1 | 7.5  |
| <b>25(OH)D<sub>3</sub>-d<sub>3</sub></b>   |             | 386.3 | 145 | [M+H-H <sub>2</sub> O] <sup>+</sup> | 30 |     | 386.3 → 107.1 |      |
| <b>Vitamin D<sub>3</sub></b>               | 10 – 14 min | 385.3 | 85  | [M+H] <sup>+</sup>                  | 30 | 250 | 385.3 → 107.0 | 11.2 |
| <b>Vitamin D<sub>3</sub>-d<sub>3</sub></b> |             | 388.3 | 120 | [M+H] <sup>+</sup>                  | 25 |     | 388.3 → 162.1 |      |

**Table S2.** Calibration models for determination of target metabolites in plasma.

| Analyte                                     | LOD<br>(pg mL <sup>-1</sup> ) | LOQ<br>(pg mL <sup>-1</sup> ) | Calibration range               | Equation                                      | Coefficient of<br>determination |
|---------------------------------------------|-------------------------------|-------------------------------|---------------------------------|-----------------------------------------------|---------------------------------|
| <b>1,24,25(OH)<sub>3</sub>D<sub>3</sub></b> | 0.3                           | 1.0                           | 1.0 – 1000 pg mL <sup>-1</sup>  | $y = 0.0043 \pm 0.0001x + 0.1489 \pm 0.0248$  | 0.9964                          |
| <b>24,25(OH)<sub>2</sub>D<sub>3</sub></b>   | 3.0                           | 10.0                          | 0.01 – 20 ng mL <sup>-1</sup>   | $y = 0.2142 \pm 0.0031x - 0.0635 \pm 0.0119$  | 0.9966                          |
| <b>1,25(OH)<sub>2</sub>D<sub>3</sub></b>    | 1.2                           | 4.0                           | 4.0 – 500 pg mL <sup>-1</sup>   | $y = 0.0026 \pm 0.0001x - 0.1254 \pm 0.0166$  | 0.9947                          |
| <b>25(OH)D<sub>3</sub></b>                  | 0.3                           | 1.0                           | 0.001 – 250 ng mL <sup>-1</sup> | $y = 0.1417 \pm 0.0011x + 0.02269 \pm 0.0113$ | 0.9991                          |
| <b>Vitamin D<sub>3</sub></b>                | 1.5                           | 5.0                           | 0.005 – 25 ng mL <sup>-1</sup>  | $y = 0.1121 \pm 0.0015x + 0.0756 \pm 0.0154$  | 0.9973                          |

**Table S3.** Spearman correlation results between metabolites and ratios involved in vitamin D<sub>3</sub> metabolism.

|                                                      |                                                                               |                                                                               | <i>p-value</i> | Correlation<br>coefficient, rho ( $\rho$ ) |
|------------------------------------------------------|-------------------------------------------------------------------------------|-------------------------------------------------------------------------------|----------------|--------------------------------------------|
| <b>Metabolite<br/>s<br/>vs.<br/>Metabolite<br/>s</b> | <b>25(OH)D<sub>3</sub></b>                                                    | <b>24,25(OH)<sub>2</sub>D<sub>3</sub></b>                                     | 0.0004         | 0.54                                       |
| <b>Metabolite<br/>s<br/>vs.<br/>Ratios</b>           | <b>1,25(OH)<sub>2</sub>D<sub>3</sub></b>                                      | <b>1,25(OH)<sub>2</sub>D<sub>3</sub>/25(OH)D<sub>3</sub></b>                  | 0.0310         | 0.89                                       |
|                                                      |                                                                               | <b>1,24,25(OH)<sub>3</sub>D<sub>3</sub>/1,25(OH)<sub>2</sub>D<sub>3</sub></b> | <0.0001        | –0.63                                      |
|                                                      | <b>24,25(OH)<sub>2</sub>D<sub>3</sub></b>                                     | <b>24,25(OH)<sub>2</sub>D<sub>3</sub>/25(OH)D<sub>3</sub></b>                 | <0.0001        | 0.82                                       |
| <b>Ratios<br/>vs.<br/>Ratios</b>                     | <b>1,24,25(OH)<sub>3</sub>D<sub>3</sub>/1,25(OH)<sub>2</sub>D<sub>3</sub></b> | <b>1,25(OH)<sub>2</sub>D<sub>3</sub>/25(OH)D<sub>3</sub></b>                  | <0.0001        | –0.70                                      |

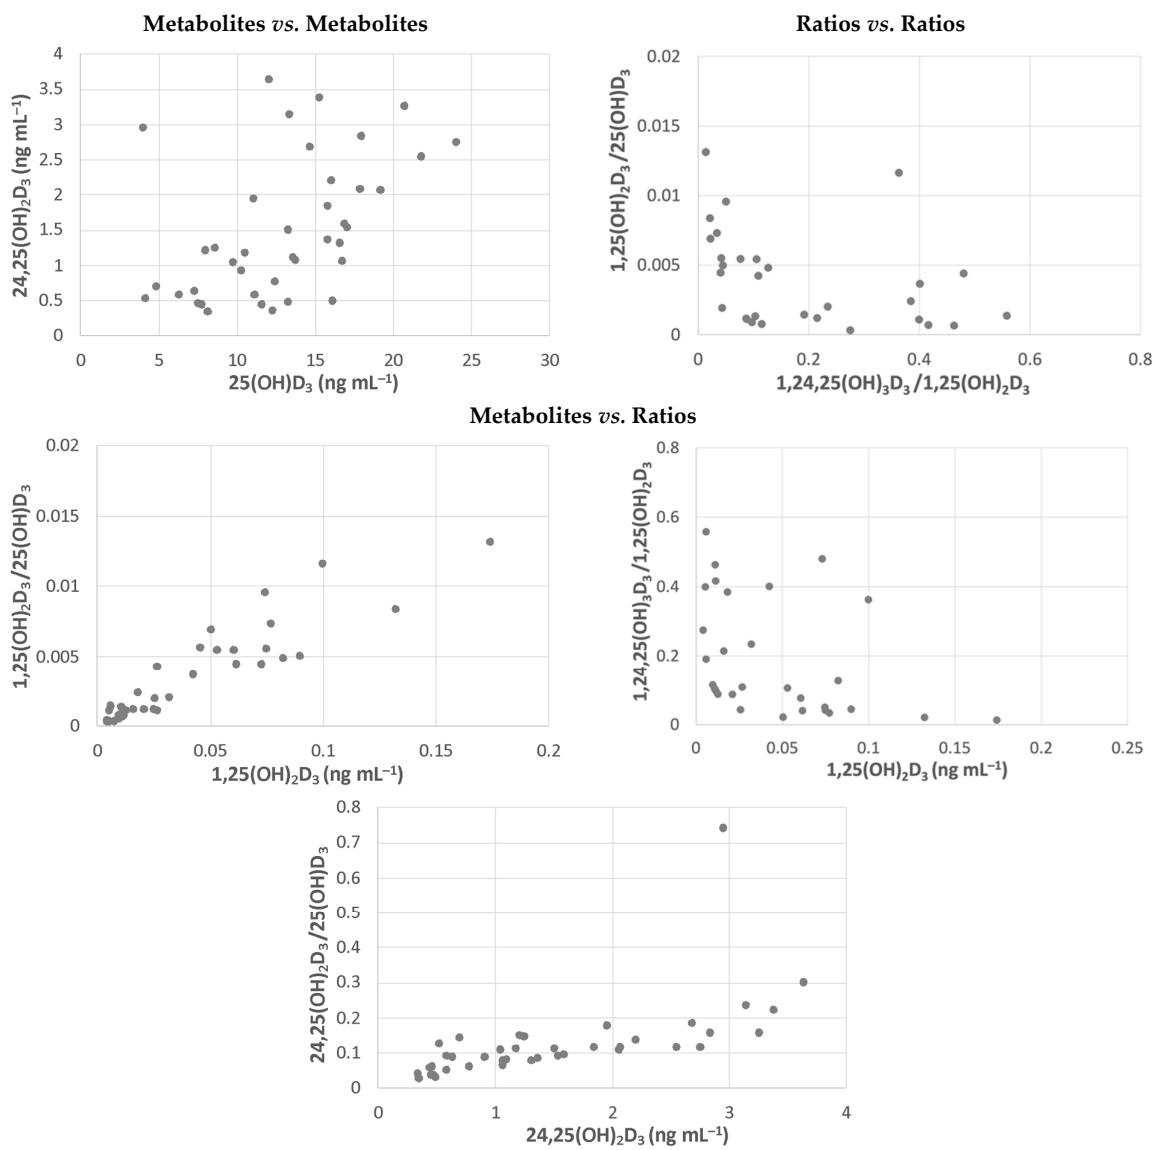

**Figure S1.** Plots of significant correlations between metabolites and ratios involved in vitamin D<sub>3</sub> metabolism.
